# Supplementary material for: Vinculin and metavinculin exhibit distinct effects on focal adhesion properties, cell migration, and mechanotransduction
Source: PubMed Central journal article supplement (PMC6726196; doi:10.1371/journal.pone.0221962), 2019-09-04
Supplement: pone.0221962.s001.pdf [file pone.0221962.s001.pdf]

S1 Table. Quantified values of FA assembly and disassembly rates of mEmerald-Vcn and mEmerald-MVcn stably expressing cells.

| Experiment                                | mEmerald-Vcn      | mEmerald-MVcn     |
|-------------------------------------------|-------------------|-------------------|
| FA assembly rate ( $\text{min}^{-1}$ )    | $0.137 \pm 0.003$ | $0.099 \pm 0.004$ |
| FA disassembly rate ( $\text{min}^{-1}$ ) | $0.128 \pm 0.002$ | $0.095 \pm 0.003$ |
