# Supplementary material for: Vinculin and metavinculin exhibit distinct effects on focal adhesion properties, cell migration, and mechanotransduction
Source: PubMed Central journal article supplement (PMC6726196; doi:10.1371/journal.pone.0221962), 2019-09-04

S1 Figure. mEmerald-Vcn and mRFP-MVcn cells were sorted for expression level using Flow activated cell sorting (FACS).

A

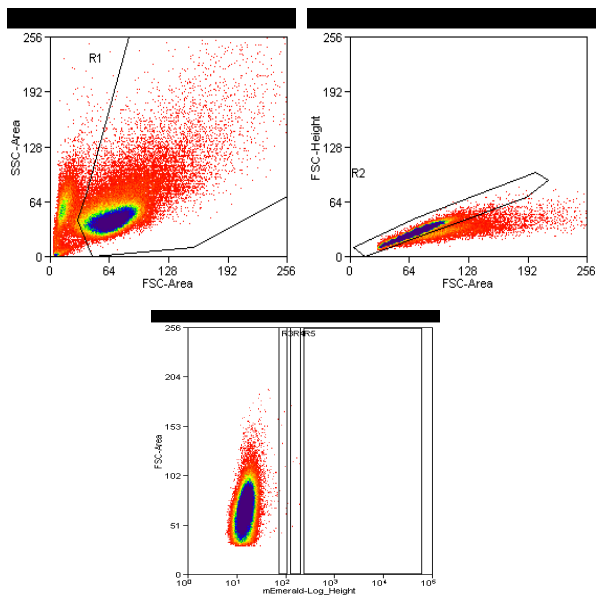

C

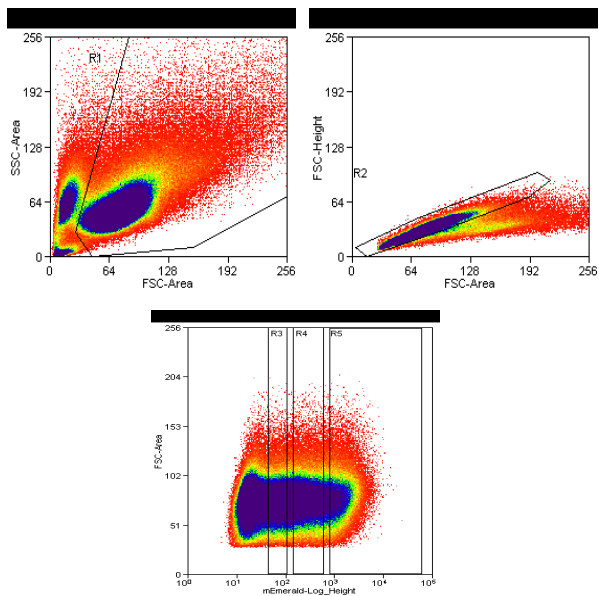

B

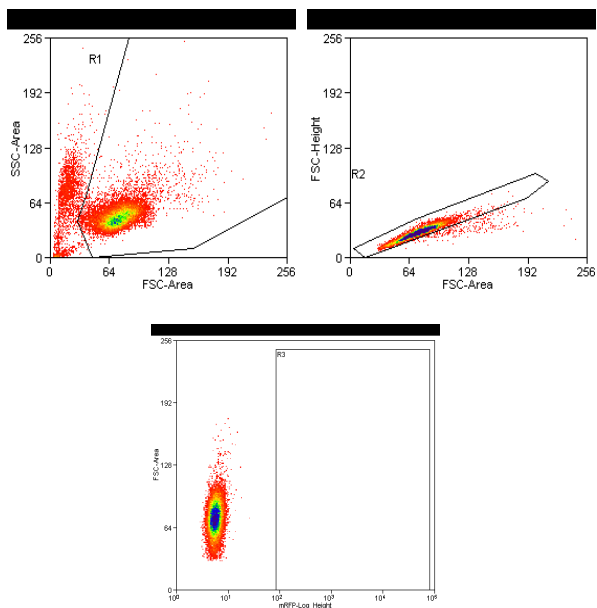

D

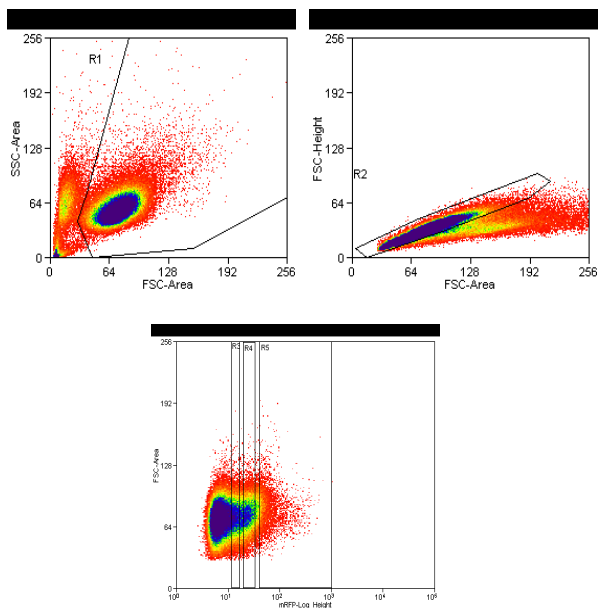

Supplement: pone.0221962.s004.pdf [file pone.0221962.s004.pdf]
