# Supplementary material for: Vinculin and metavinculin exhibit distinct effects on focal adhesion properties, cell migration, and mechanotransduction
Source: PubMed Central journal article supplement (PMC6726196; doi:10.1371/journal.pone.0221962), 2019-09-04

S5 Figure. 3DFM experimental set-up and controls.

A

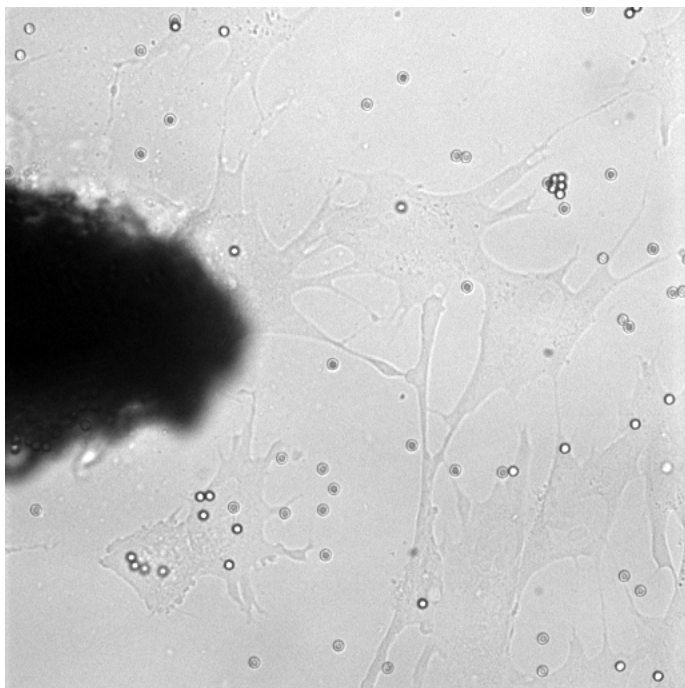

B

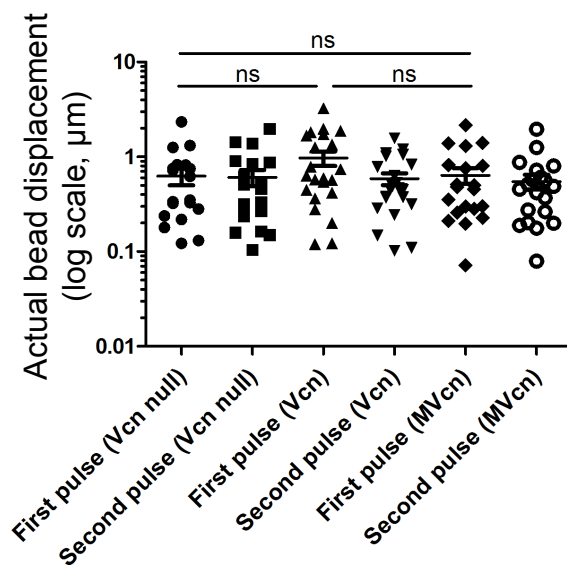

C

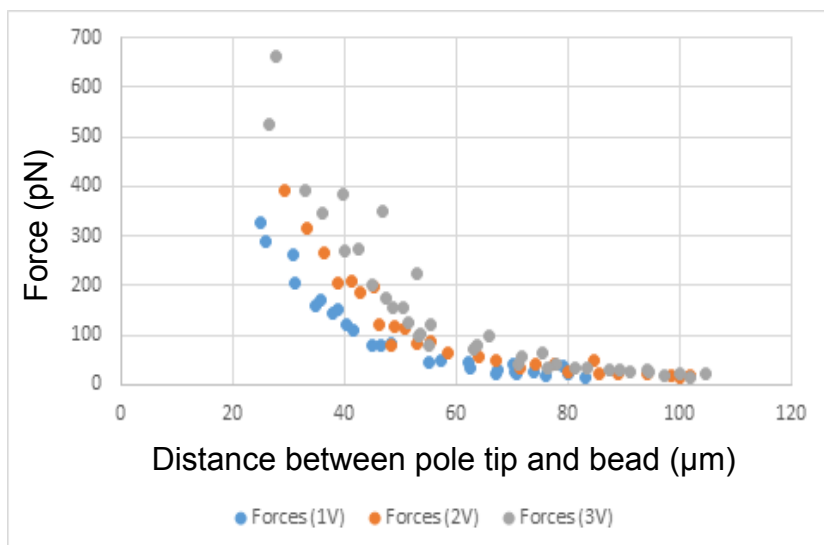

Supplement: pone.0221962.s008.pdf [file pone.0221962.s008.pdf]
