# Supplementary material for: Vinculin and metavinculin exhibit distinct effects on focal adhesion properties, cell migration, and mechanotransduction
Source: PubMed Central journal article supplement (PMC6726196; doi:10.1371/journal.pone.0221962), 2019-09-04

S8 Figure. Paired data set for each cell type in S5B Fig between first and second pulse.

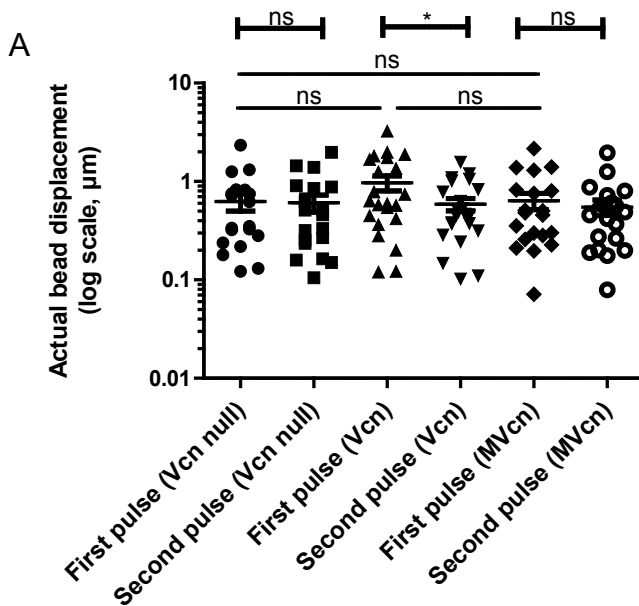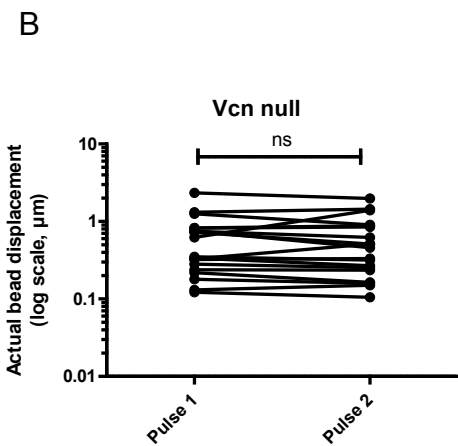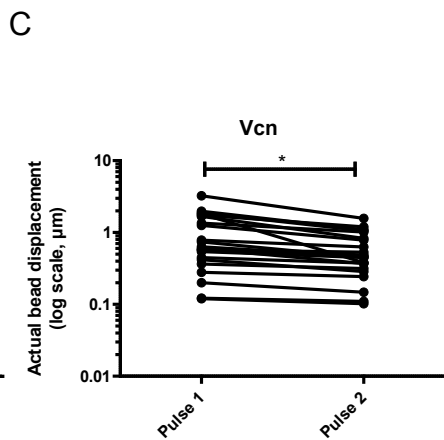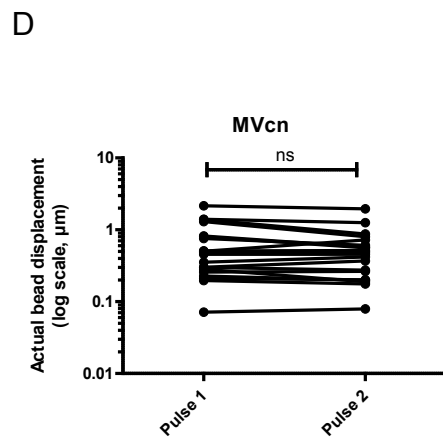

Supplement: pone.0221962.s011.pdf [file pone.0221962.s011.pdf]
